# Supplementary material for: Using fluoro modified RNA aptamers as affinity ligands on magnetic beads for sensitive thrombin detection through affinity capture and thrombin catalysis
Source: Royal Society of Chemistry journal article supplement (doi:10.1039/c5ay02665b), 2015-12-09
Supplement: c5ay02665b1.pdf [file c5ay02665b1.pdf]

## **Electronic Supplementary Materials**

### **Using Fluoro Modified RNA Aptamers as Affinity Ligands on Magnetic Beads for Sensitive Thrombin Detection through Affinity Capture and Thrombin Catalysis**

Lihua Hao,<sup>1,2</sup> Qiang Zhao<sup>1,2\*</sup>

<sup>1</sup>Institute of Environmental Science, College of Chemistry and Chemical Engineering, Shanxi University, Taiyuan, P. R. China, 030006

<sup>2</sup>State Key Laboratory of Environmental Chemistry and Ecotoxicology, Research Center for Eco-Environmental Sciences, Chinese Academy of Sciences, Beijing, 100085, P. R. China

Phone: 86-10-62849892. Fax 86-10-62849892.

E-mail: chemzhaoq@hotmail.com, qiangzhao@rcees.ac.cn

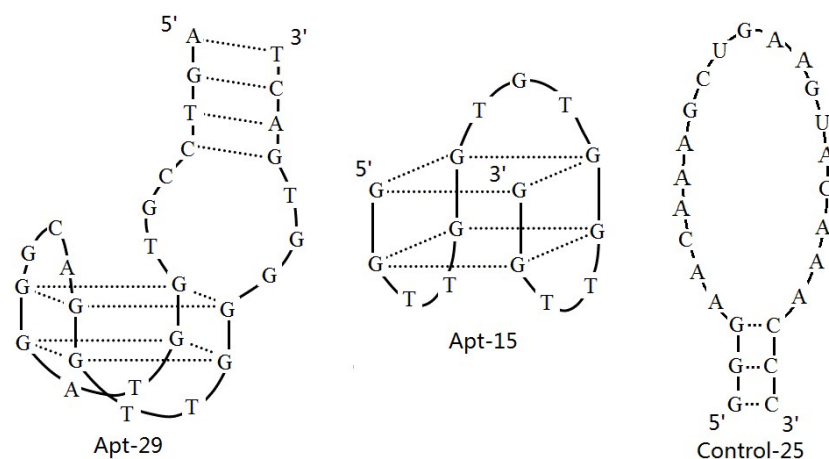

**Fig. S1** Predicted structures of DNA aptamer Apt-29, DNA aptamer Apt-15, and the RNA Control-25.

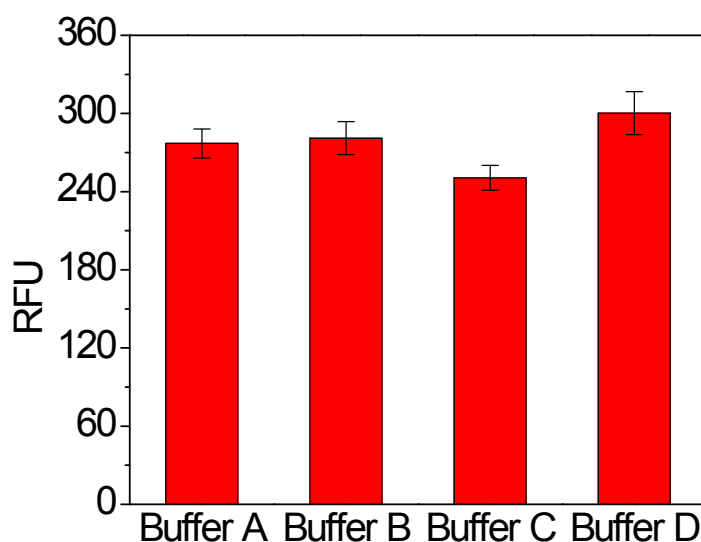

**Fig. S2** Effect of types of binding buffer solution in the assay using Toggle-25 coated magnetic beads and fluorogenic substrate. Buffer A contained 20 mM Tris-HCl (pH 7.5), 150 mM NaCl, and 2 mM  $\text{CaCl}_2$ ; Buffer B contained 20 mM Tris-HCl (pH 7.5), 150 mM NaCl, and 2 mM  $\text{MgCl}_2$ ; Buffer C contained 20 mM HEPES (pH 7.5), 150 mM NaCl, and 2 mM  $\text{CaCl}_2$ ; Buffer D contained 10 mM  $\text{Na}_2\text{HPO}_4$ , 2 mM  $\text{KH}_2\text{PO}_4$ , 2.7 mM KCl, 137 mM NaCl and 2 mM  $\text{MgCl}_2$  (pH 7.5). The concentration of tested thrombin was 10 pM.

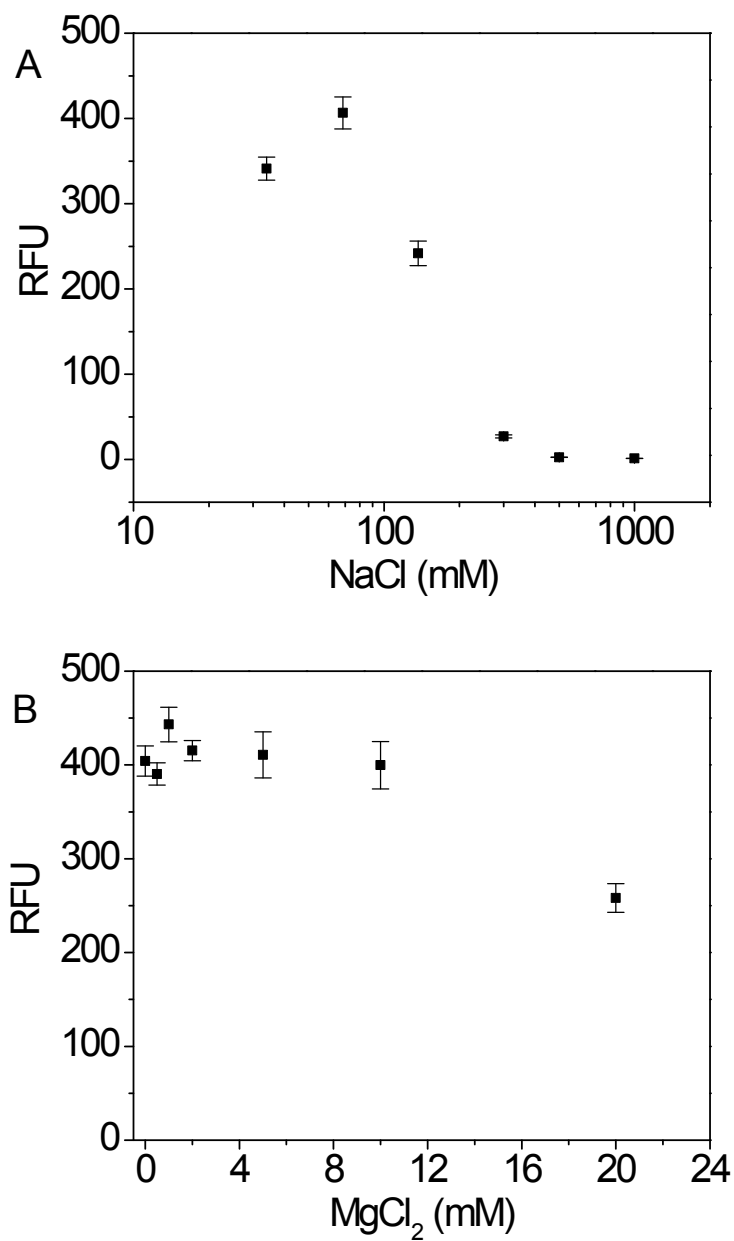

**Fig. S3** (A) Effect of NaCl in the binding solution (10 mM Na<sub>2</sub>HPO<sub>4</sub>, 2 mM KH<sub>2</sub>PO<sub>4</sub>, 2.7 mM KCl, 2 mM MgCl<sub>2</sub>, 1 mg/mL BSA) on the obtained signal. (B) Effect of MgCl<sub>2</sub> in the binding solution (10 mM Na<sub>2</sub>HPO<sub>4</sub>, 2 mM KH<sub>2</sub>PO<sub>4</sub>, 2.7 mM KCl, 68.5 mM NaCl, 1 mg/mL BSA, pH 7.5) on the obtained signal.

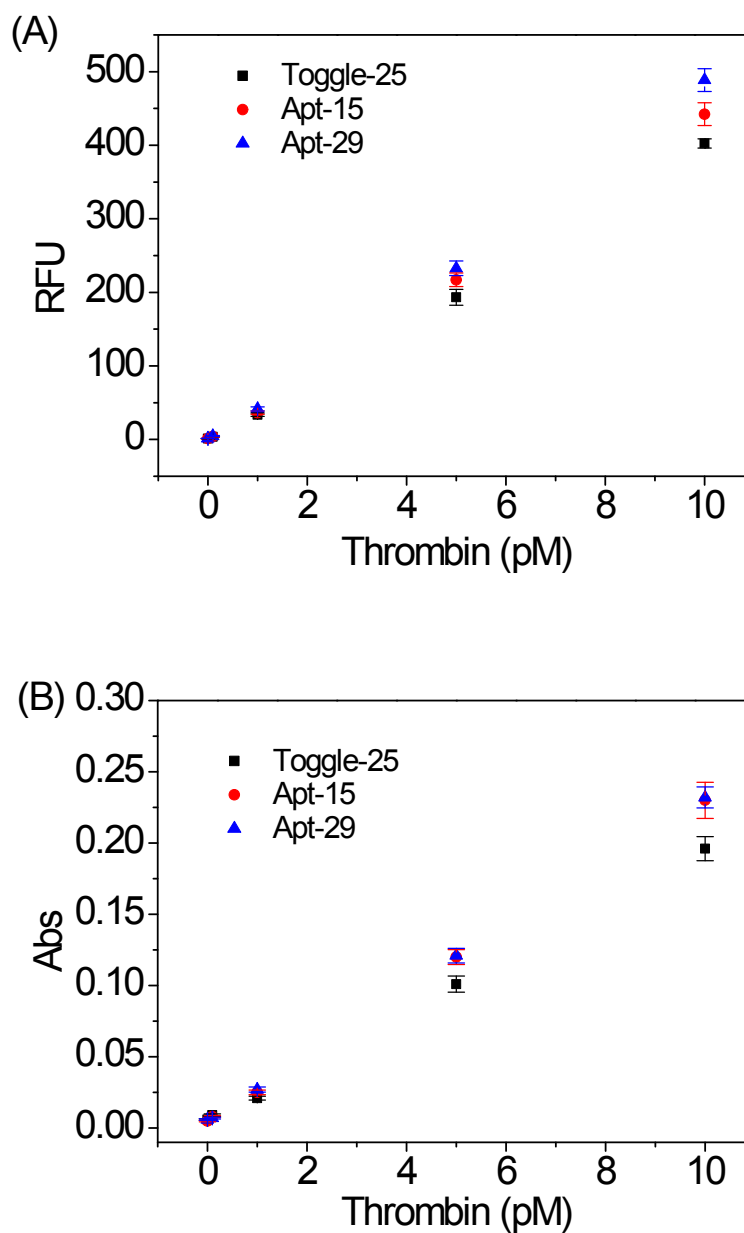

**Fig. S4** Comparison of assay sensitivity for thrombin detection in assay using RNA aptamer Toggle-25, DNA aptamer Apt-15, or DNA aptamer Apt-29 as affinity ligands on magnetic beads. (A) using fluorogenic substrate in the assay; (B) using chromogenic substrate in the assay. The aptamers were conjugated on magnetic beads following the same procedure, and assays were conducted at the same conditions.

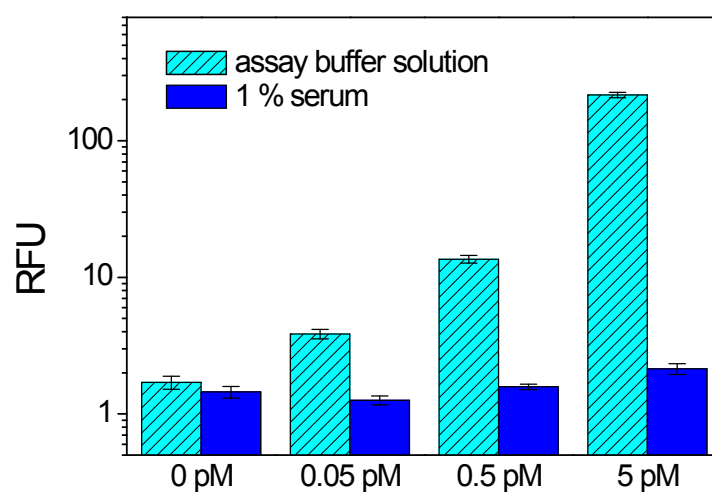

**Fig. S5** Detection of thrombin in assay buffer solution or in 100-fold diluted serum by using aptamer Toggle-25-without-F coated magnetic beads and fluorogenic substrate in enzyme reaction.
